# Supplementary material for: Physically entangled multifunctional eutectogels for flexible sensors with mechanically robust
Source: Royal Society of Chemistry journal article supplement (doi:10.1039/d4ta02751e), 2024-01-01
Supplement: d4ta02751e1.pdf [file d4ta02751e1.pdf]

**Supporting Information for Journal of Materials Chemistry A**

**Physically entangled multifunctional eutectogels for flexible sensors  
with mechanically robust**

*Qianwen Lu,<sup>a</sup> Hengfeng Li<sup>\*a</sup> and Zhijian Tan<sup>\*b</sup>*

*<sup>a</sup> School of Materials Science and Engineering, Central South University, Changsha  
410083, Hunan P. R. China.*

*<sup>b</sup> Institute of Bast Fiber Crops, Chinese Academy of Agricultural Sciences, Changsha  
410205, Hunan, P. R. China.*

\*To whom correspondence should be addressed.

E-mail: [lih@csu.edu.cn](mailto:lih@csu.edu.cn) (H. Li); [tanzhijian@caas.cn](mailto:tanzhijian@caas.cn) (Z. Tan)

## Table of contents

|                                                                                                                                   |    |
|-----------------------------------------------------------------------------------------------------------------------------------|----|
| 1. Definitions of abbreviations .....                                                                                             | 3  |
| 2. Comparison of eutectogels as sensors .....                                                                                     | 3  |
| 3. Experimental section .....                                                                                                     | 4  |
| 4. Simulation calculation of the PAA/CC eutectogel.....                                                                           | 5  |
| 5. Characterization of the PAA/CC eutectogel .....                                                                                | 8  |
| 5.1 Fourier transform infrared (FTIR) and <sup>1</sup> H nuclear magnetic resonance ( <sup>1</sup> H NMR) spectra of PAA/CC ..... | 8  |
| 5.2 The mechanical, adhesive, self-healing, and conductive performances of PAA/CC eutectogel.....                                 | 10 |
| 5.3 The antibacterial performance of PAA/CC eutectogel .....                                                                      | 23 |
| 6. Wearable strain sensor applications of PAA/CC eutectogel.....                                                                  | 25 |
| 7. Video .....                                                                                                                    | 26 |
| 8. References .....                                                                                                               | 27 |

## 1. Definitions of abbreviations

AA: acrylic acid; PAA: poly(acrylic acid ); ChCl: choline chloride; Ca: catechol; CC: ChCl–Ca; Re: resorcinol; CR: ChCl–Re; Hy: hydroquinone; CH: ChCl–Hy; EA: ethyl acetate; PEGDA: poly(ethylene glycol) diacrylate; Irgacure 1173: 2-hydroxy-2-methylpropiophenone; CS: cefotaxime sodium; PU: polyurethane; PMMA: poly(methyl methacrylate), PTFE: polytetrafluoroethylene.

## 2. Comparison of eutectogels as sensors

**Table S1.** Comparison of eutectogels as strain sensors

| Overview           | Tensile strength (MPa)                              | Elongation (%) | Adhesion     | Self-healing | Temperature adaptability | Antibacterial activity |          |
|--------------------|-----------------------------------------------------|----------------|--------------|--------------|--------------------------|------------------------|----------|
| 2021 <sup>1</sup>  | Supramolecular-polymer double-network eutectogels   | 0.26           | 4400         | ☑            | ☑                        | ☑                      | ☑        |
| 2022 <sup>2</sup>  | PVI-based eutectogels                               | 0.49           | 2300         | ☑            | ☑                        | ☑                      | ☑        |
| 2022 <sup>3</sup>  | WPU-based eutectogels                               | 6.09           | 1707         | ☑            | ☑                        | ☑                      | ☑        |
| 2023 <sup>4</sup>  | Hydrophilic/hydrophobic heterostructure eutectogels | 0.06           | 330          | ☑            | ☑                        | ☑                      | ☑        |
| 2023 <sup>5</sup>  | Supramolecular-polymer double-network eutectogels   | 0.21           | 4300         | ☑            | ☑                        | ☑                      | ☑        |
| 2022 <sup>6</sup>  | Cellulose-based eutectogels                         | 1.25           | 1400         | ☑            | ☑                        | ☑                      | ☑        |
| 2023 <sup>7</sup>  | Polymeric eutectogels                               | 8.8            | 1100         | ☑            | ☑                        | ☑                      | ☑        |
| 2021 <sup>8</sup>  | Binary polymer-based eutectogels                    | 2.6            | 6.8          | ☑            | ☑                        | ☑                      | ☑        |
| 2022 <sup>9</sup>  | PVA-based eutectogels                               | 20.2           | 550          | ☑            | ☑                        | ☑                      | ☑        |
| 2023 <sup>10</sup> | SR-PVA eutectogels                                  | 1.67           | 590          | ☑            | ☑                        | ☑                      | ☑        |
| 2021 <sup>11</sup> | WPU-based eutectogels                               | 1.12           | 178          | ☑            | ☑                        | ☑                      | ☑        |
| 2023 <sup>12</sup> | Dual crosslinked eutectogels                        | 6.17           | 1067         | ☑            | ☑                        | ☑                      | ☑        |
| 2023 <sup>13</sup> | Lignin-based eutectogels                            | 0.05           | 460          | ☑            | ☑                        | ☑                      | ☑        |
| 2023 <sup>14</sup> | Hydrophobic eutectogels                             | 0.25           | 400          | ☑            | ☑                        | ☑                      | ☑        |
| 2023 <sup>15</sup> | Double-network binary solvent eutectogels           | 3.25           | 574          | ☑            | ☑                        | ☑                      | ☑        |
| 2023 <sup>16</sup> | PU-based eutectogels                                | 4.1            | 1110         | ☑            | ☑                        | ☑                      | ☑        |
| <b>This work</b>   | <b>PAA/CC eutectogels</b>                           | <b>8.04</b>    | <b>620.5</b> | <b>☑</b>     | <b>☑</b>                 | <b>☑</b>               | <b>☑</b> |

### 3. Experimental section

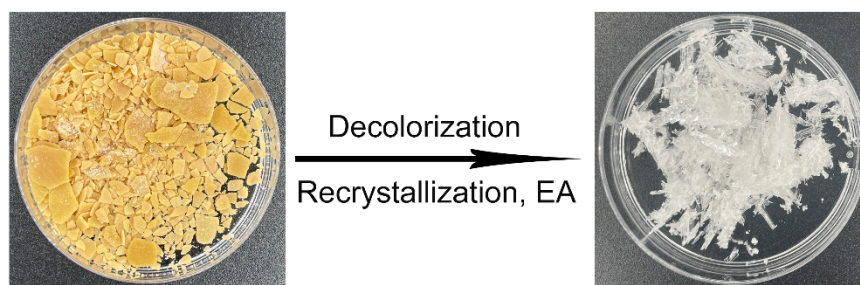

**Figure S1.** The decolorization and recrystallization of Ca.

**Table S2.** Six types of DESs.

| DESs             | HBA (g) | HBD (g) | Molar ratios |
|------------------|---------|---------|--------------|
| ChCl-Ca-1 (CC-1) | 27.9    | 22.0    | 1:1          |
| ChCl-Ca (CC)     | 27.9    | 44.0    | 1:2          |
| ChCl-Re-1 (CR-1) | 27.9    | 22.0    | 1:1          |
| ChCl-Re (CR)     | 27.9    | 44.0    | 1:2          |
| ChCl-Hy-1(CH-1)  | 27.9    | 22.0    | 1:1          |
| ChCl-Hy (CH)     | 27.9    | 44.0    | 1:2          |

**Table S3.** PAA eutectogels with different kinds of DESs.

|                        | AA<br>(g) | DES<br>(g) | 1173<br>(mg) | PEGDA<br>(mg) | Tensile<br>fracture<br>stress<br>(MPa) | Tensile<br>fracture<br>strain<br>(%) | Work of<br>extension<br>at fracture<br>(MJ m <sup>-3</sup> ) | Healing<br>efficiency<br>(%) | $\sigma$<br>(S m <sup>-1</sup> ) |
|------------------------|-----------|------------|--------------|---------------|----------------------------------------|--------------------------------------|--------------------------------------------------------------|------------------------------|----------------------------------|
| PAA/CC <sub>60-1</sub> | 4         | 6          | 40           | 0             | 0.672                                  | 1528.2                               | 4.07±1.13                                                    | 92.15                        | 1.42±0.06                        |
| PAA/CR <sub>60-1</sub> | 4         | 6          | 40           | 0             | 0.619                                  | 2309.2                               | 5.34±0.67                                                    | 83.53                        | 1.14±0.12                        |
| PAA/CH <sub>60-1</sub> | 4         | 6          | 40           | 0             | 0.525                                  | 2465.9                               | 7.65±0.49                                                    | 79.91                        | 0.93±0.08                        |
| PAA/CC                 | 4         | 6          | 40           | 0             | 8.044                                  | 620.5                                | 28.69±2.23                                                   | 72.71                        | 0.43±0.07                        |
| PAA/CR <sub>60</sub>   | 4         | 6          | 40           | 0             | 5.336                                  | 653.7                                | 16.92±1.14                                                   | 77.14                        | 0.82±0.04                        |
| PAA/CH <sub>60</sub>   | 4         | 6          | 40           | 0             | 4.656                                  | 792.5                                | 26.97±2.31                                                   | 74.11                        | 0.77±0.06                        |

**Table S4.** PAA eutectogels with different CC and PEGDA contents.

|  | AA<br>(g) | DES<br>(g) | 1173<br>(mg) | PEGDA<br>(mg) | Tensile<br>fracture<br>stress | Tensile<br>fracture<br>strain | Work of<br>extension<br>at fracture | Healing<br>efficiency<br>(%) | $\sigma$<br>(S m <sup>-1</sup> ) |
|--|-----------|------------|--------------|---------------|-------------------------------|-------------------------------|-------------------------------------|------------------------------|----------------------------------|
|--|-----------|------------|--------------|---------------|-------------------------------|-------------------------------|-------------------------------------|------------------------------|----------------------------------|

|                                        |   |   |    |       | (MPa)  | (%)    | (MJ m <sup>-3</sup> ) |       |           |
|----------------------------------------|---|---|----|-------|--------|--------|-----------------------|-------|-----------|
| PAA/CC <sub>50</sub>                   | 5 | 5 | 50 | 0     | 18.136 | 525.5  | 60.96±1.33            | 50.70 | 0.25±0.01 |
| PAA/CC                                 | 4 | 6 | 40 | 0     | 8.044  | 620.5  | 28.69±2.23            | 72.71 | 0.43±0.07 |
| PAA/CC <sub>60</sub> P <sub>0.1</sub>  | 4 | 6 | 40 | 22.2  | 5.377  | 575.2  | 18.40±2.09            | 68.84 | 0.53±0.06 |
| PAA/CC <sub>60</sub> P <sub>0.25</sub> | 4 | 6 | 40 | 55.5  | 4.520  | 487.9  | 11.32±1.37            | 65.10 | 0.69±0.02 |
| PAA/CC <sub>60</sub> P <sub>0.5</sub>  | 4 | 6 | 40 | 111.0 | 4.481  | 413.7  | 10.48±0.41            | 59.23 | 0.72±0.06 |
| PAA/CC <sub>60</sub> P <sub>0.75</sub> | 4 | 6 | 40 | 166.5 | 3.936  | 365.2  | 7.36±1.56             | 55.35 | 0.91±0.01 |
| PAA/CC <sub>60</sub> P <sub>1.0</sub>  | 4 | 6 | 40 | 222.0 | 3.628  | 296.9  | 7.47±1.40             | 53.83 | 0.85±0.03 |
| PAA/CC <sub>70</sub>                   | 3 | 7 | 30 | 0     | 1.220  | 1149.0 | 6.36±1.32             | 86.00 | 0.68±0.04 |

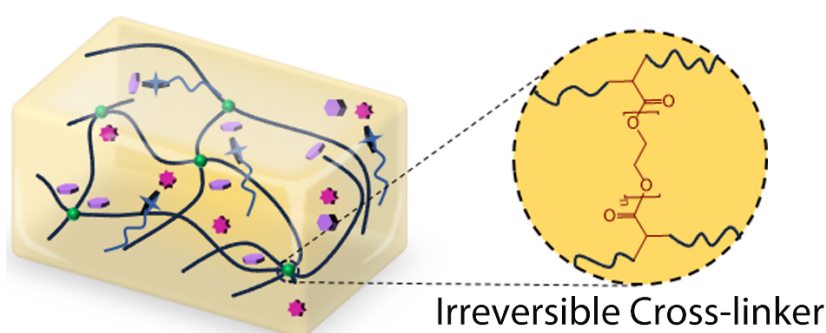

**Figure S2.** Schematic fabrication diagram of PAA/CC eutectogel, when polymerizing with the presence of PEGDA.

#### 4. Simulation calculation of the PAA/CC eutectogel

**Interaction energy:** The symmetry-adapted perturbation theory (SAPT) interaction energy was calculated using P<sub>SI</sub>4 software under the level of sSAPT/jun-cc-pVTZ standard and the independent gradient model based on the Hirshfeld partition (IGMH) method in multiwfn.<sup>17-19</sup> The polymer chain was simplified into ten repeated AA components.

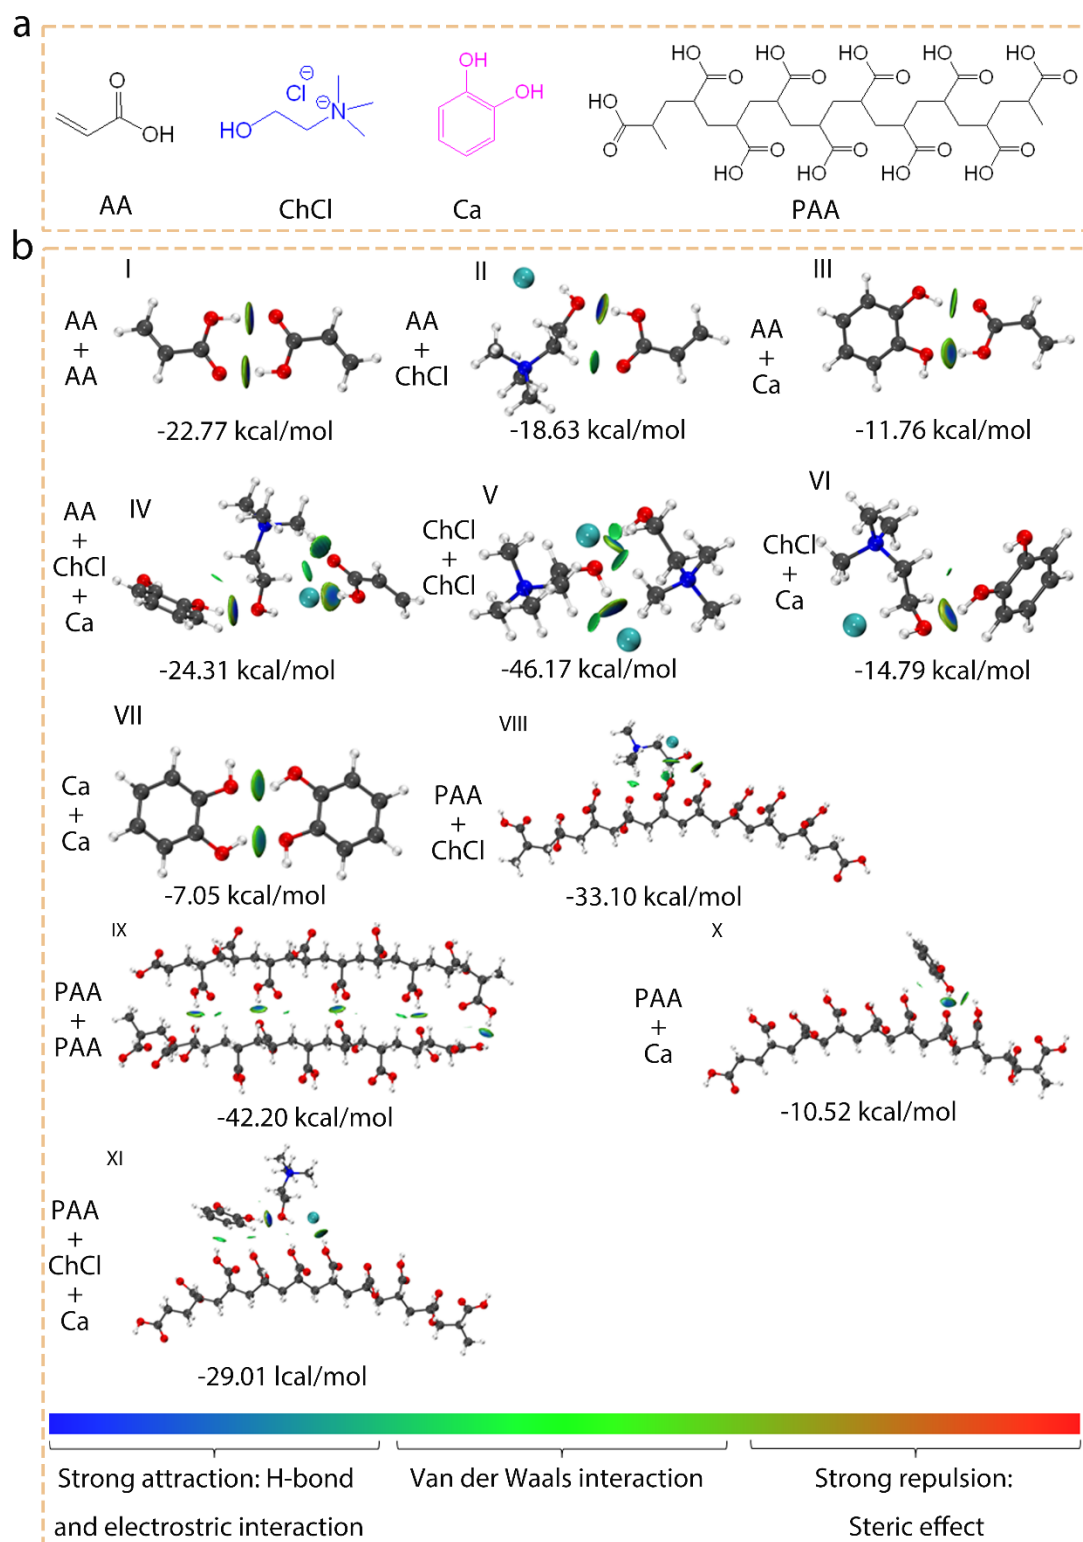

**Figure S3.** Chemical structures and SAPT analysis of AA, ChCl, Ca, and PAA: (a) Chemical structures of AA, ChCl, Ca, and PAA; (b) Different combination modes and the IGM isosurfaces between AA, ChCl, Ca, and PAA.

**Table S5.** Results of the SAPT analysis for interaction energy between AA, PAA, ChCl, and Ca.

| Combination<br>modes | $E_{electrostatics}$<br>(kcal mol <sup>-1</sup> ) | $E_{exchange}$<br>(kcal mol <sup>-1</sup> ) | $E_{introduction}$<br>(kcal mol <sup>-1</sup> ) | $E_{dispersion}$<br>(kcal mol <sup>-1</sup> ) | $E_{total}$<br>(kcal mol <sup>-1</sup> ) |
|----------------------|---------------------------------------------------|---------------------------------------------|-------------------------------------------------|-----------------------------------------------|------------------------------------------|
| I                    | -34.92                                            | 35.15                                       | -16.60                                          | -6.40                                         | -22.77                                   |
| II                   | -25.30                                            | 21.60                                       | -9.39                                           | -5.55                                         | -18.63                                   |
| III                  | -20.06                                            | 21.34                                       | -7.80                                           | -5.24                                         | -11.76                                   |
| IV                   | -31.69                                            | 26.86                                       | -12.42                                          | -7.06                                         | -24.31                                   |
| V                    | -59.16                                            | 44.75                                       | -18.92                                          | -12.85                                        | -46.17                                   |
| VI                   | -20.14                                            | 18.53                                       | -7.03                                           | -6.15                                         | -14.79                                   |
| VII                  | -12.97                                            | 13.28                                       | -2.94                                           | -4.42                                         | -7.05                                    |
| VIII                 | -40.81                                            | 33.82                                       | -13.78                                          | -12.33                                        | -33.10                                   |
| IX                   | -62.74                                            | 59.14                                       | -25.21                                          | -13.58                                        | -42.40                                   |
| X                    | -20.25                                            | 24.17                                       | -8.19                                           | -6.25                                         | -10.52                                   |
| XI                   | -32.21                                            | 30.67                                       | -11.21                                          | -17.26                                        | -29.01                                   |

**Cohesive energy density (CED):** Three simplified molecular models of PAA/CC were built. The cohesive energy density (CED) was carried out using the Materials Studio (MS) software package<sup>20</sup> shown in Figure 1c and Figure S2. It was calculated according to Eqs. 1-2.

$$CED = \frac{E_{coh}}{V} \quad (1)$$

$$E_{coh} = E_{intra} - E_{total} \quad (2)$$

where  $E_{coh}$  is the cohesive energy,  $V$  is the volume of a system,  $E_{intra}$  is the intramolecular electrostatic energy, and  $E_{total}$  is the total electrostatic energy of a system.<sup>21, 22</sup>

The calculation details were the same as in our previous work.<sup>23</sup>

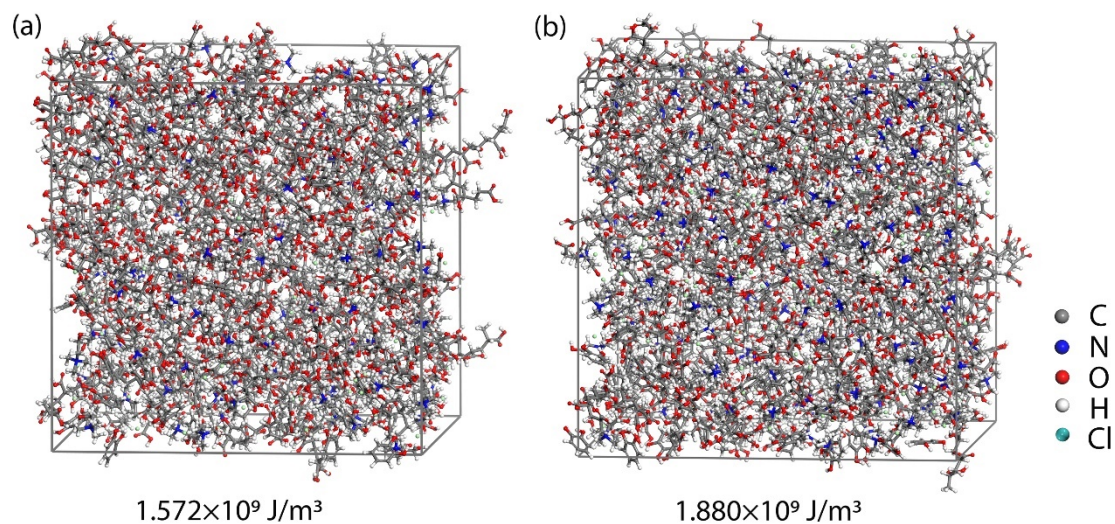

**Figure S4.** CED molecular models of PAA/CC: (a) The content of CC is 50 wt% (60 PAA molecules; 120 ChCl molecules; 240 Ca molecules); (b) The content of CC is 70 wt% (36 PAA molecules; 181 ChCl molecules; 362 Ca molecules).

## 5. Characterization of the PAA/CC eutectogel

### 5.1 Fourier transform infrared (FTIR) and $^1\text{H}$ nuclear magnetic resonance ( $^1\text{H}$ NMR) spectra of PAA/CC

FTIR spectra were recorded by a Thermo Scientific Nicolet iS10 FTIR spectrometer from 4000 to  $400 \text{ cm}^{-1}$  at room temperature.  $^1\text{H}$  NMR spectra were acquired by a Bruker-AVANCE III 500 spectrometer at room temperature with the use of the  $\text{CD}_3\text{OD}$ .



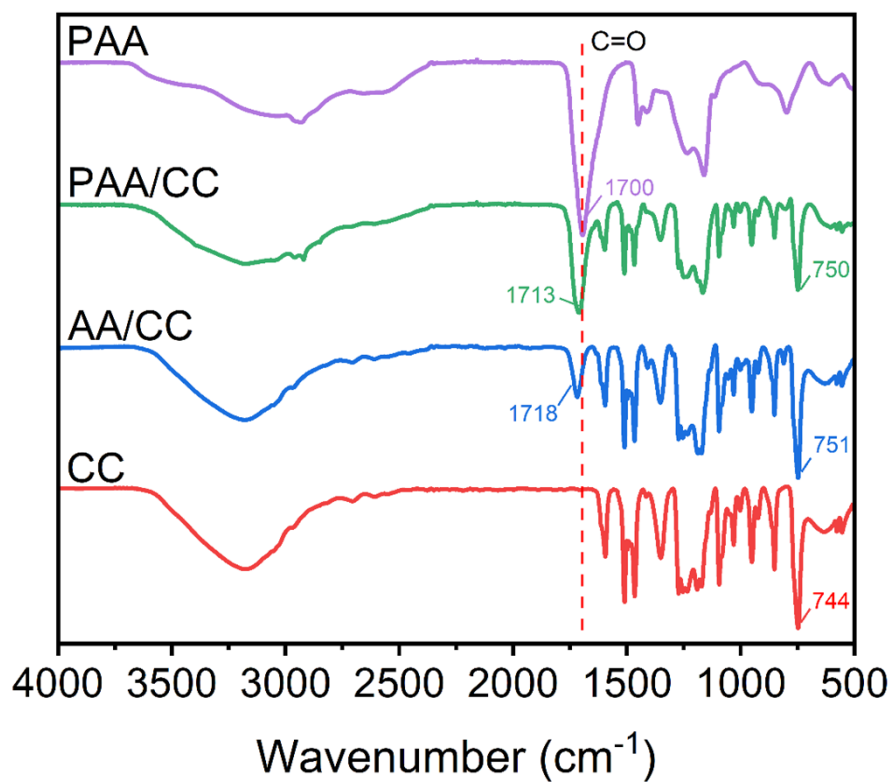

**Figure S5.** The FTIR spectra of PAA hydrogel, PAA/CC eutectogel, AA/CC, and CC.

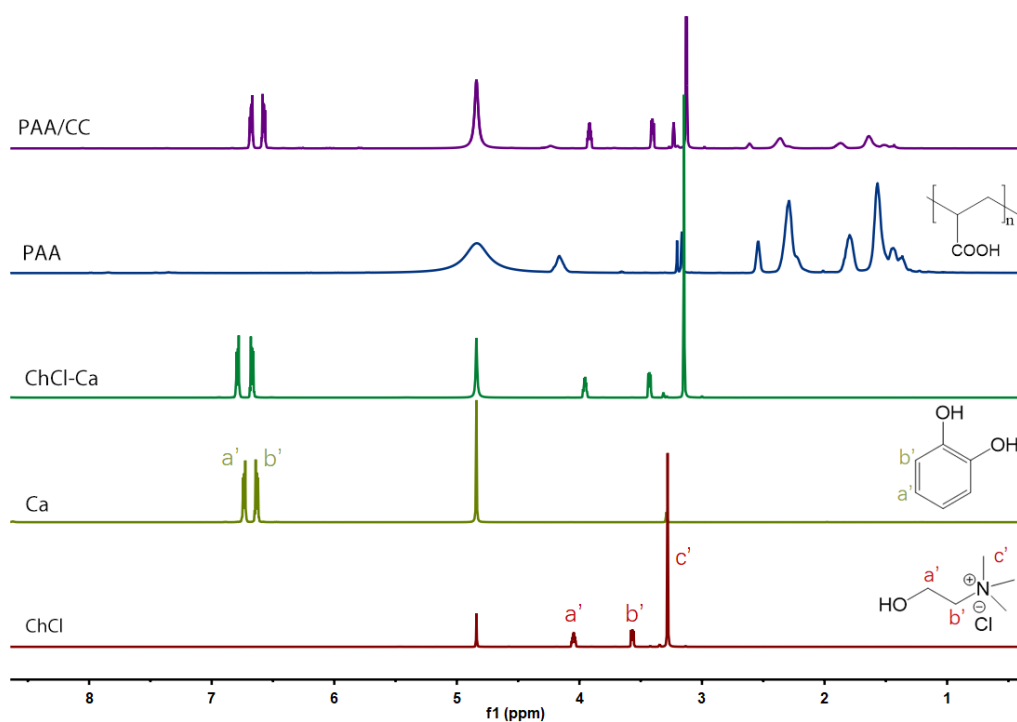

**Figure S6.** The  $^1\text{H}$  NMR spectra (500 MHz,  $\text{CD}_3\text{OD}$ , room temperature) of ChCl, Ca, CC, PAA hydrogel and PAA/CC eutectogel.

## **5.2 The mechanical, adhesive, self-healing, and conductive performances of PAA/CC eutectogel**

**The transparency of PAA/CC eutectogel:** The transparency test was performed in a transmittance tester (RK-6000T, Guangzhou Ruike Optoelectronic Technology Co., Ltd., China). A square eutectogel sheet (20 mm × 20 mm × 1 mm) was used.

**Mechanical performance of PAA/CC eutectogel:** The tensile and cyclic stretch-release tests were conducted in materials universal testing machine with a 500 N load cell. The velocities of tensile and cyclic stretch-release are 200 and 500 mm min<sup>-1</sup>, respectively. The compressive tests were conducted using a materials universal testing machine with a 5000 N load cell at a speed of 20 mm min<sup>-1</sup>.

**Rheological tests:** The rheological tests were performed on an Anton Paar MCR 92 rheometer. The roto PP25 with a diameter of 25 mm was used and the gap at 1mm. The frequency sweep tests were conducted from 0.1 to 100 rad/s with 1% constant strain. The stepwise strain tests were carried out at a small strain of 0.1% and a big strain of 100%. The temperature sweep tests were executed from 25 to 110 °C.

**Thermogravimetric analysis (TGA) tests:** The TGA data were collected by a Shimadzu TGA-50/50H at 10 °C min<sup>-1</sup> from 25 °C to 800 °C in a nitrogen atmosphere.

**Differential scanning calorimetry (DSC) tests:** The DSC measurements were performed using a NETZSCH DSC 200F3 at 10 °C min<sup>-1</sup> from -100 °C to 100 °C under flowing nitrogen.

**Dynamic thermomechanical analysis (DMA) tests:** The DMA data were obtained on a DMAQ800-Waters Technology (China) Limited using the shear model.

**Adhesive performance of PAA/CC eutectogels:** The adhesion tests were conducted

using the lap shear method<sup>24</sup> with the universal testing machine at 200 mm min<sup>-1</sup>. All samples were sandwiched in between different pristine substrates, and two binder clips were placed on the specimens for 2 h to form intimate contact.

Low-temperature and high-temperature adhesion test: All specimens were stored at -20 or 80 °C for 2 h before the adhesion tests.

**Self-healing performance of PAA/CC eutectogels:** To evaluate the self-healing ability of PAA/CC eutectogel, a rectangular eutectogel sheet (40 mm × 10 mm × 2 mm) was cut into two pieces. The two separated specimens were placed in contact at room temperature and dry environment for 12 h. Healing efficiency (HE) was defined as Eq. 3.

$$HE = \frac{BE_{Virgin}}{BE_{Healed}} \quad (3)$$

where  $BE_{Virgin}$  and  $BE_{Healed}$  are breaking elongations of virgin and healed eutectogels.

**Ionic conductivity measurement:** The measurement method was the same as in our previous work.<sup>23</sup> Briefly, the ionic conductivity of eutectogels was measured by a three-probe method via an electrochemical workstation (DH7000C). Three conductive data were recorded for each sample. The ionic conductivity ( $\sigma$ ) was calculated by Eq. 4.

$$\sigma = \frac{L}{RS} \quad (4)$$

where R is the resistance, S is the surface area of the measured eutectogels, and L is the thickness of the measured eutectogels.

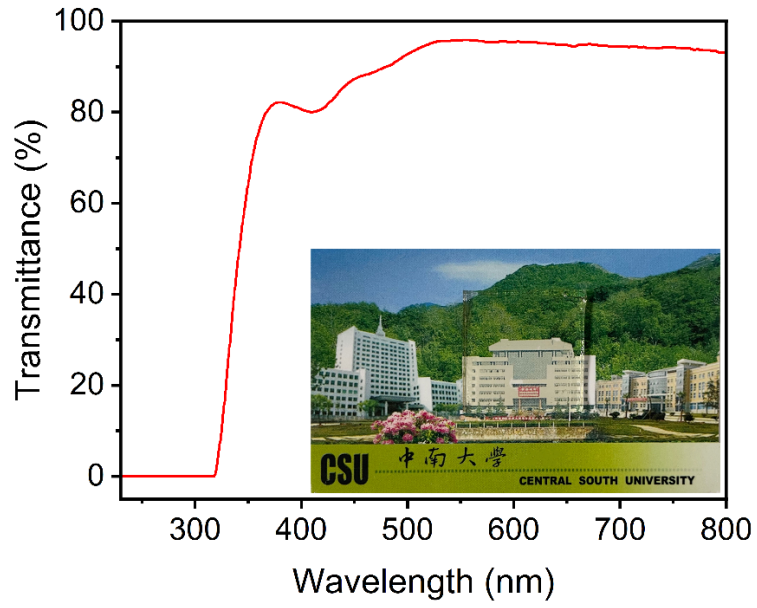

**Figure S7.** Transmittance of PAA/CC. The inset image showed the excellent transparency of PAA/CC with a 1.0 mm thickness.

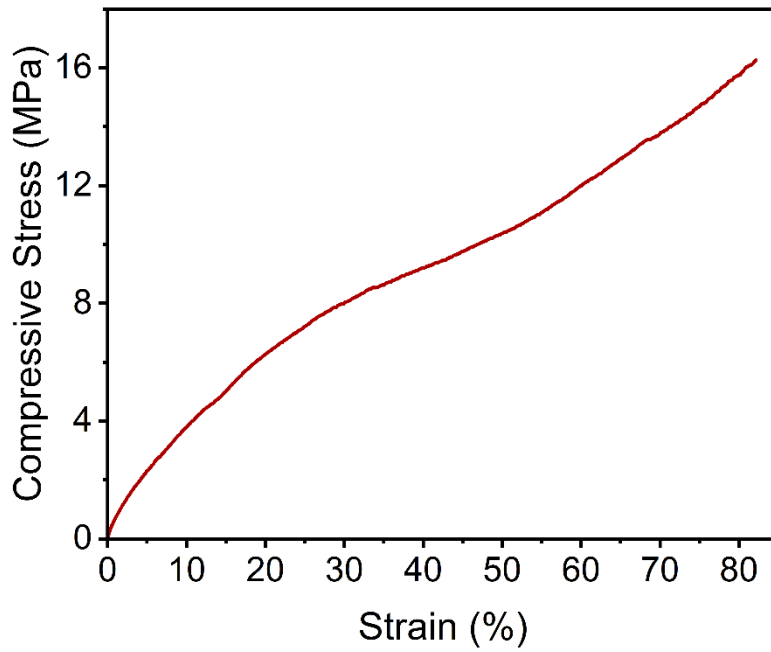

**Figure S8.** The compressive strain-stress curve of PAA/CC.

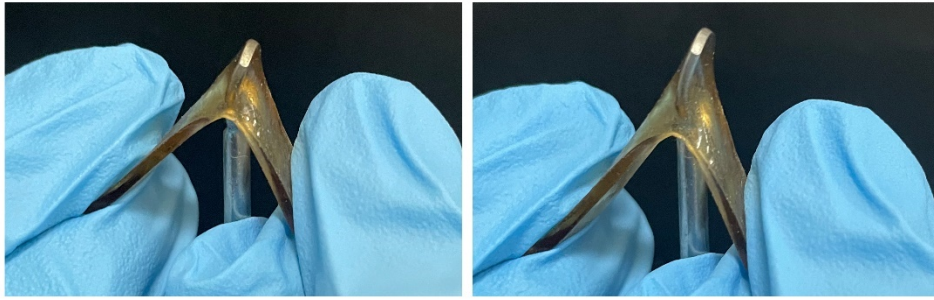

**Figure S9.** The photograph of PAA/CC blocks the piercing of blunt weapons.

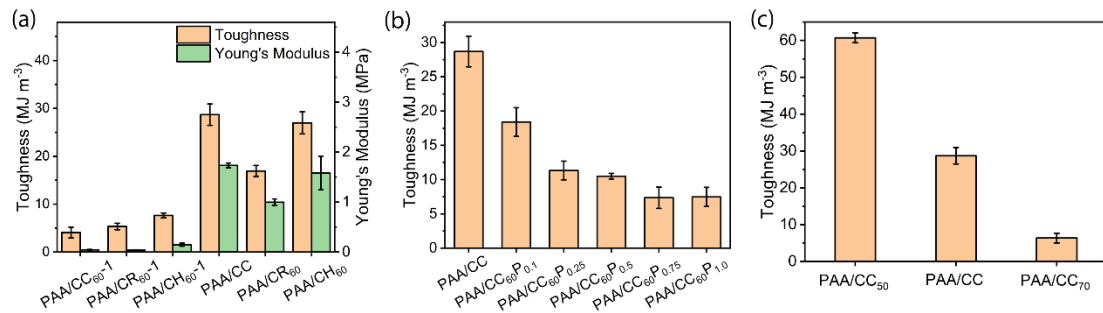

**Figure S10.** Toughness and Young's modulus values of: (a) The six eutectogels; (b) PAA/CC<sub>60</sub>P<sub>y</sub> ( $y=0, 0.1, 0.25, 0.5, 0.75$  and  $1.0$ , mean the addition amount of crosslinking agent as  $0.1\%$ ,  $0.25\%$ ,  $0.5\%$ ,  $0.75\%$  and  $1.0\%$  (mol/mol) of AA); (c) PAA/CC<sub>x</sub> ( $x=50, 60$ , and  $70$ , denote the CC content as  $50\%$ ,  $60\%$ , and  $70\%$  (w/w)).

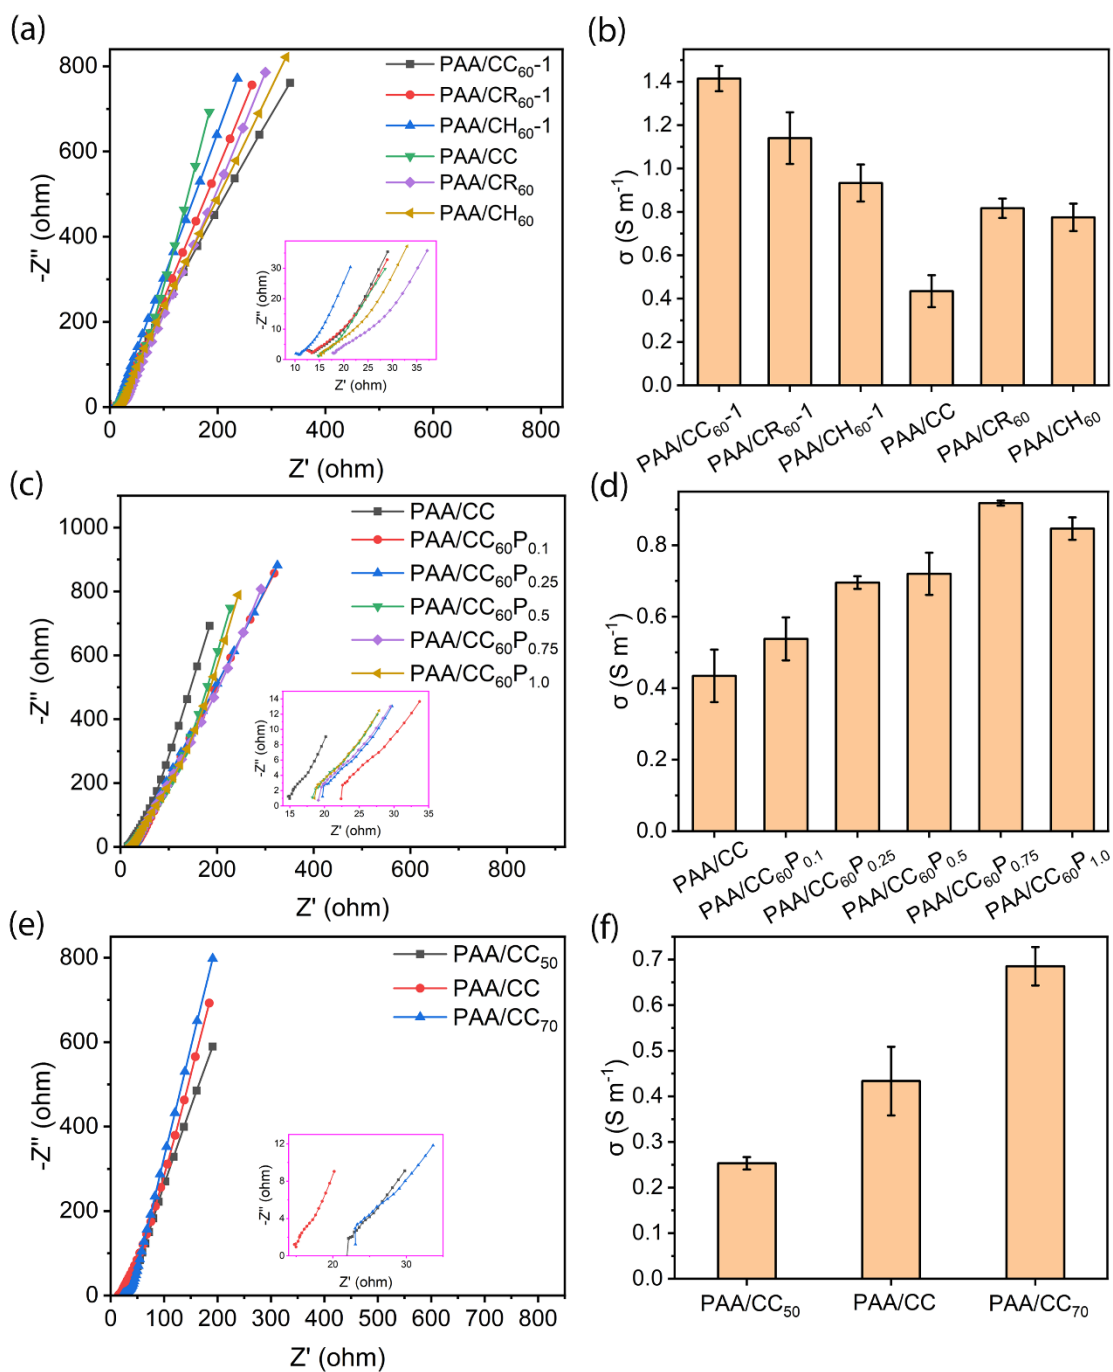

**Figure S11.** Ionic conductivity measurement: (a,b) Electrochemical impedance spectroscopy (EIS) and ionic conductivity of the six eutectogels; (c,d) EIS and ionic conductivity of PAA/CC<sub>60</sub>P<sub>y</sub> ( $y=0, 0.1, 0.25, 0.5, 0.75$  and  $1.0$ , mean the addition amount of crosslinking agent as 0.1%, 0.25%, 0.5%, 0.75% and 1.0% (mol/mol) of AA); (e,f) EIS and ionic conductivity of PAA/CC<sub>x</sub> ( $x=50, 60$  and  $70$ , denote the CC content as 50%, 60%, and 70% (w/w)).

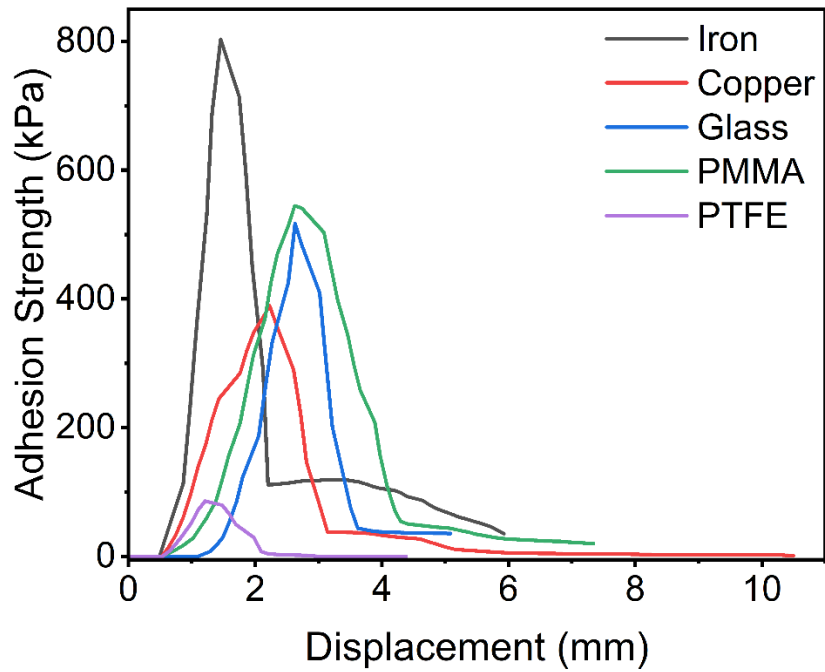

**Figure S12.** The adhesion lap-shear test of PAA/CC with different substrates (iron, copper, glass, PMMA, and PTFE).

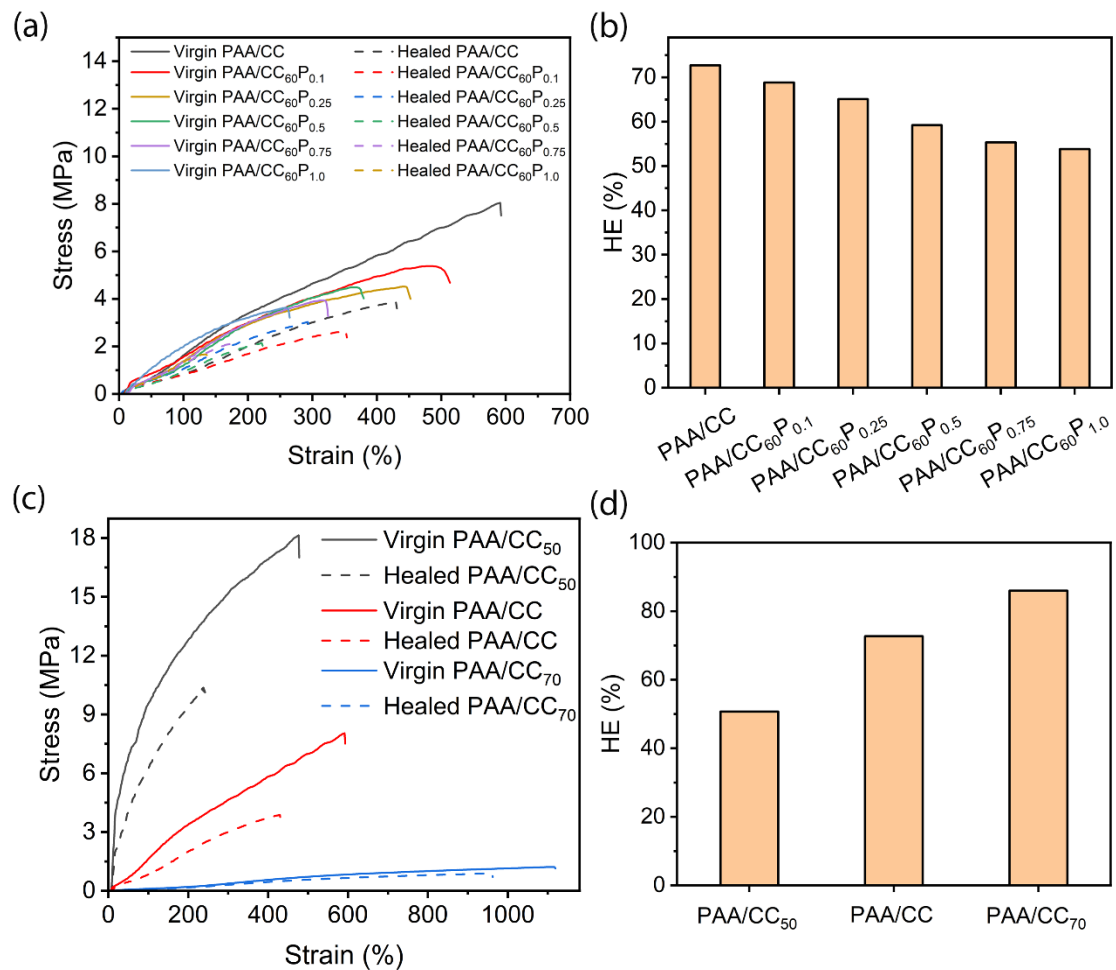

**Figure S13.** The tensile strain-stress curves and effectiveness of: (a,b) PAA/CC<sub>60</sub>P<sub>y</sub> (y=0, 0.1, 0.25, 0.5, 0.75 and 1.0, mean the addition amount of crosslinking agent as 0.1%, 0.25%, 0.5%, 0.75% and 1.0% (mol/mol) of AA); (c,d) PAA/CC<sub>x</sub> (x=50, 60, and 70, denote the CC content as 50%, 60%, and 70% (w/w)).

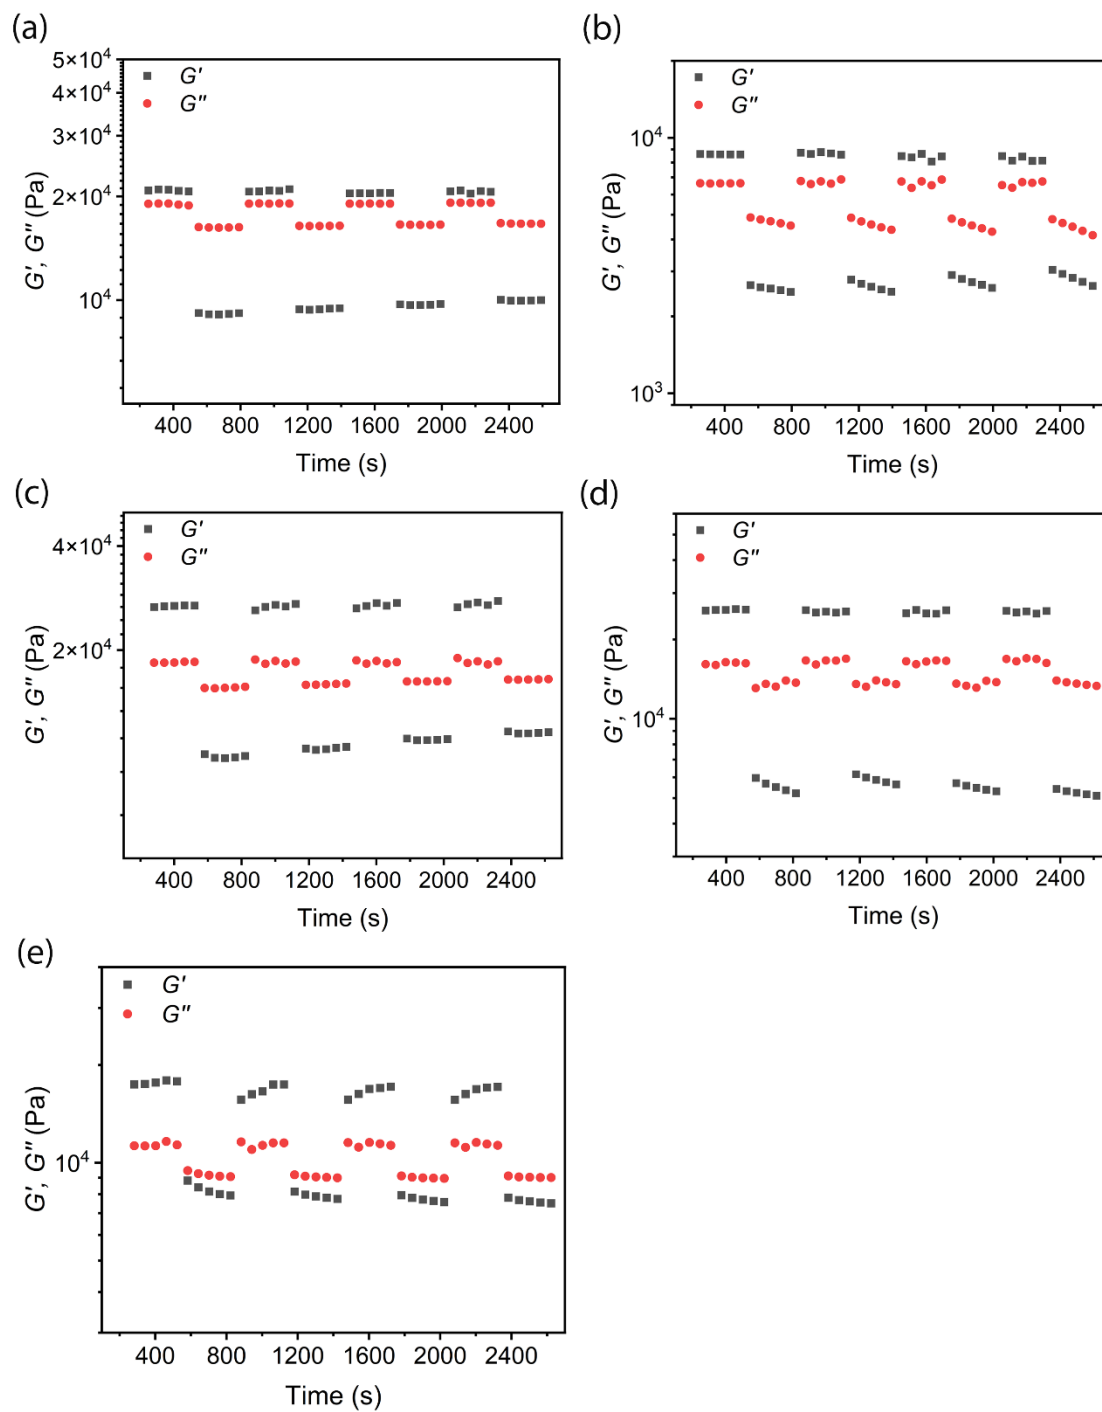



**Figure S14.** The rheological stepwise strain test of: (a) PAA/CC<sub>60</sub>-1; (b) PAA/CH<sub>60</sub>-1; (c) PAA/CR<sub>60</sub>-1; (d) PAA/CH<sub>60</sub>; (e) PAA/CR<sub>60</sub>.

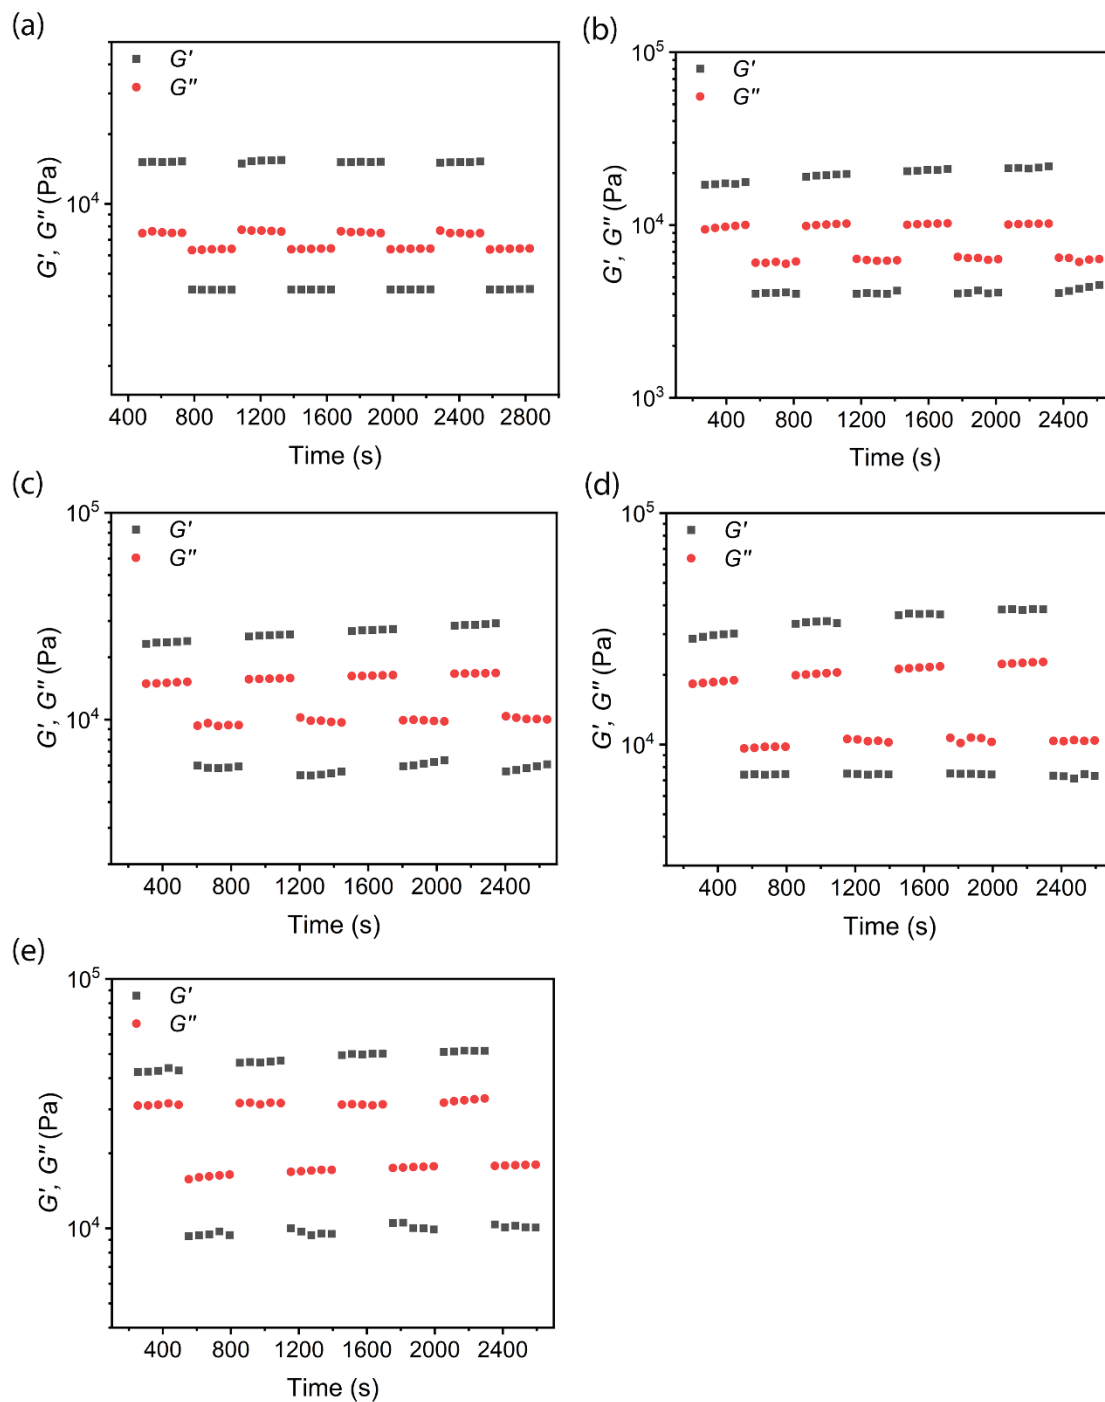

**Figure S15.** The rheological stepwise strain test of: (a) PAA/CC<sub>60</sub>P<sub>0.1</sub>; (b) PAA/CC<sub>60</sub>P<sub>0.25</sub>; (c) PAA/CC<sub>60</sub>P<sub>0.5</sub>; (d) PAA/CC<sub>60</sub>P<sub>0.75</sub>; (e) PAA/CC<sub>60</sub>P<sub>1.0</sub>.

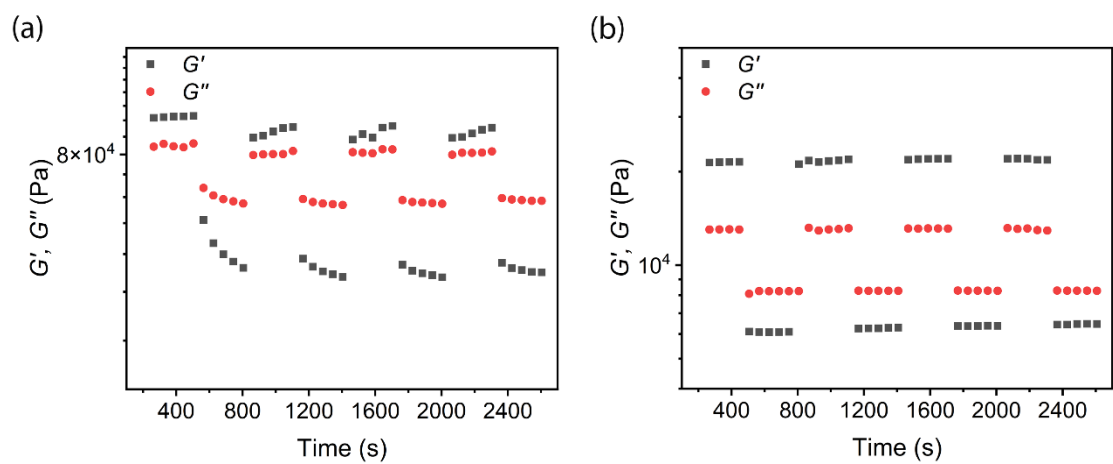

**Figure S16.** The rheological stepwise strain test of: (a) PAA/CC<sub>50</sub>; (b) PAA/CC<sub>70</sub>.

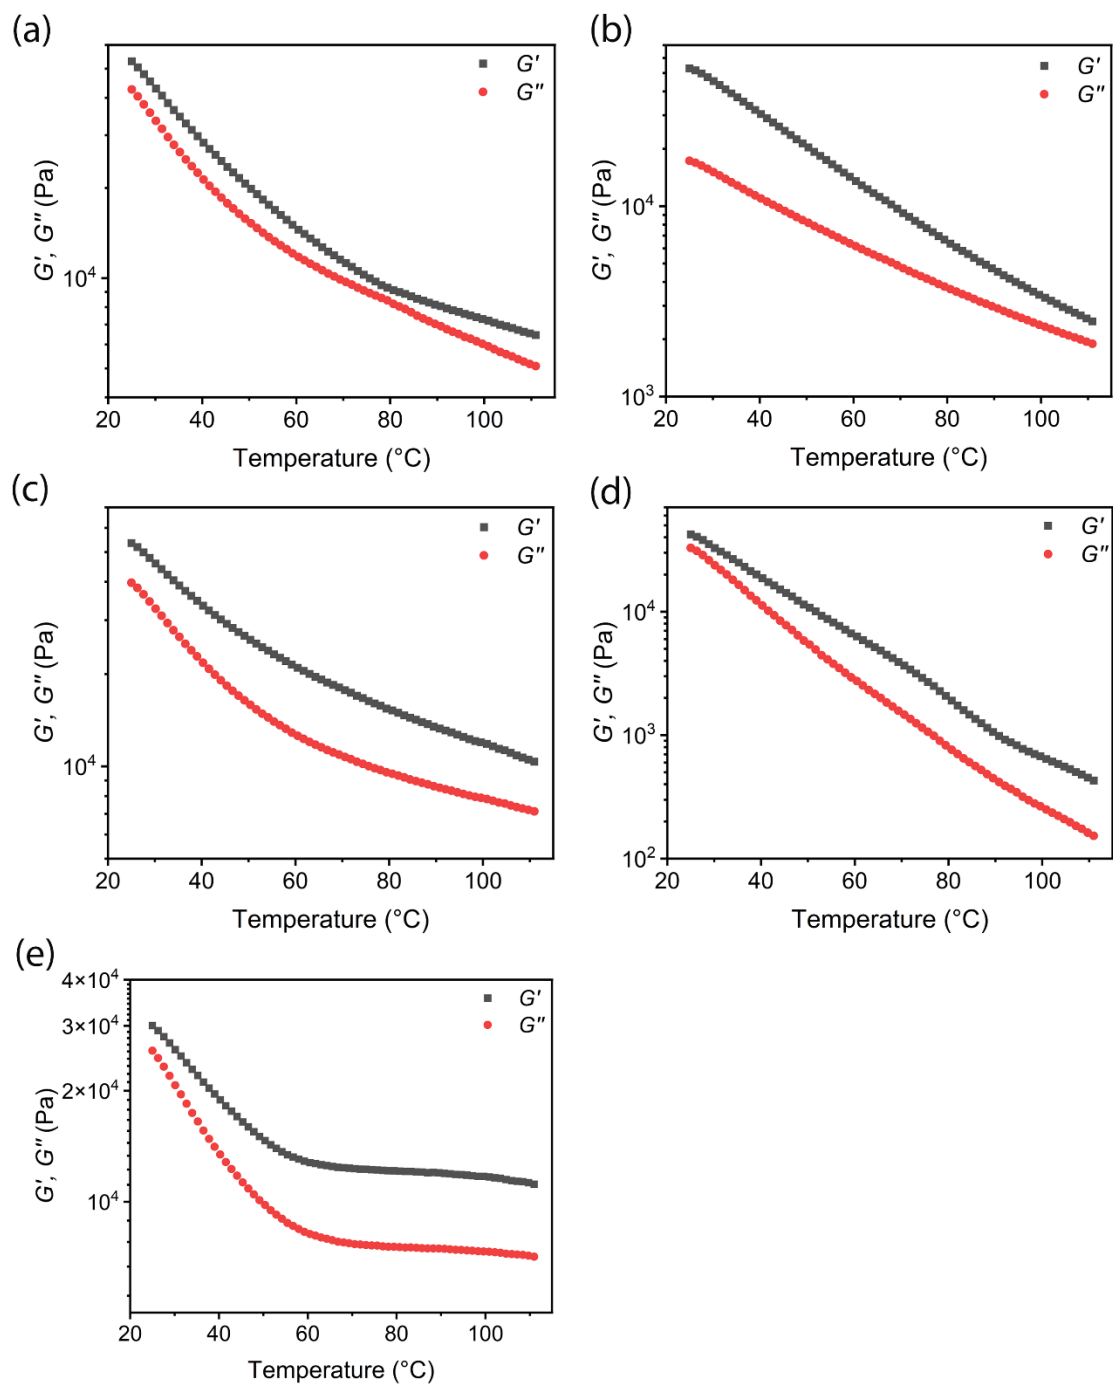

**Figure S17.** The temperature ramp rheological test with the temperature ranging from 25  $^{\circ}\text{C}$  to 110  $^{\circ}\text{C}$ . (a) PAA/CC<sub>60</sub>-1. (b) PAA/CH<sub>60</sub>-1. (c) PAA/CR<sub>60</sub>-1. (d) PAA/CH<sub>60</sub>. (e) PAA/CR<sub>60</sub>.

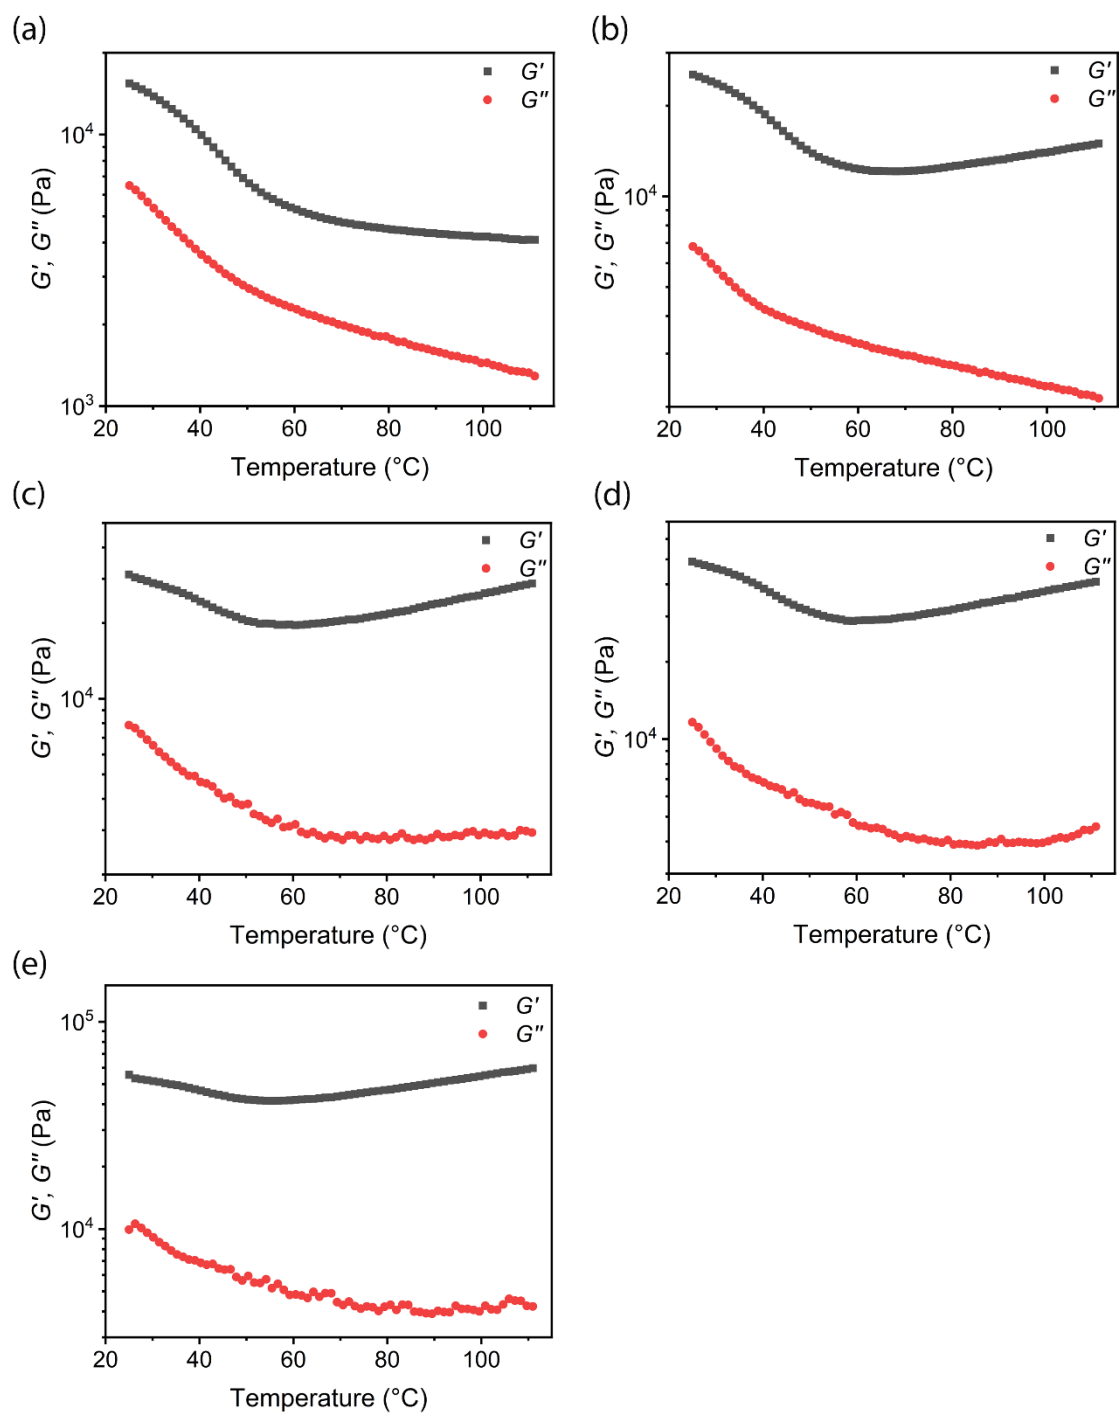

**Figure S18.** The temperature ramp rheological test with the temperature ranging from 25 °C to 110 °C. (a) PAA/CC<sub>60</sub>P<sub>0.1</sub>. (b) PAA/CC<sub>60</sub>P<sub>0.25</sub>. (c) PAA/CC<sub>60</sub>P<sub>0.5</sub>. (d) PAA/CC<sub>60</sub>P<sub>0.75</sub>. (e) PAA/CC<sub>60</sub>P<sub>1.0</sub>.

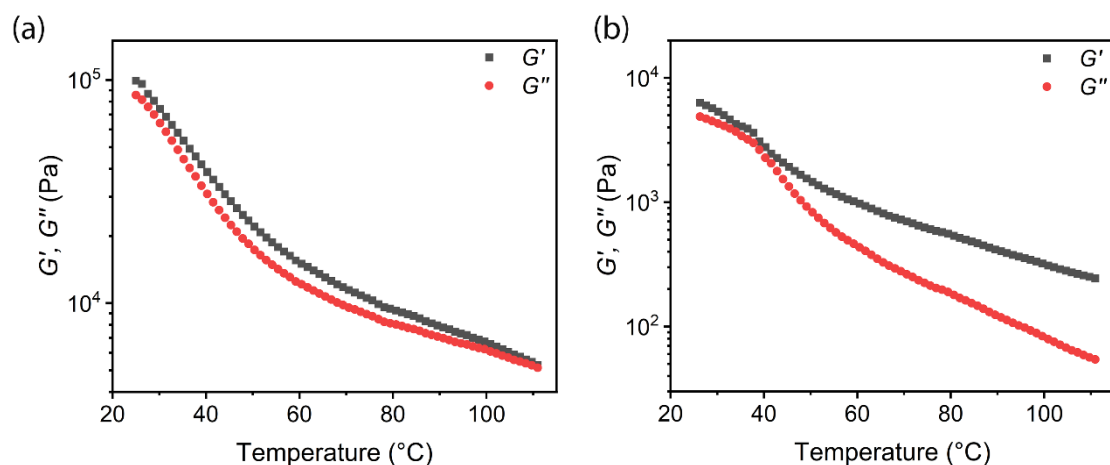

**Figure S19.** The temperature ramp rheological test with the temperature ranging from 25  $^{\circ}\text{C}$  to 110  $^{\circ}\text{C}$ . (a) PAA/CC<sub>50</sub>. (b) PAA/CC<sub>70</sub>.

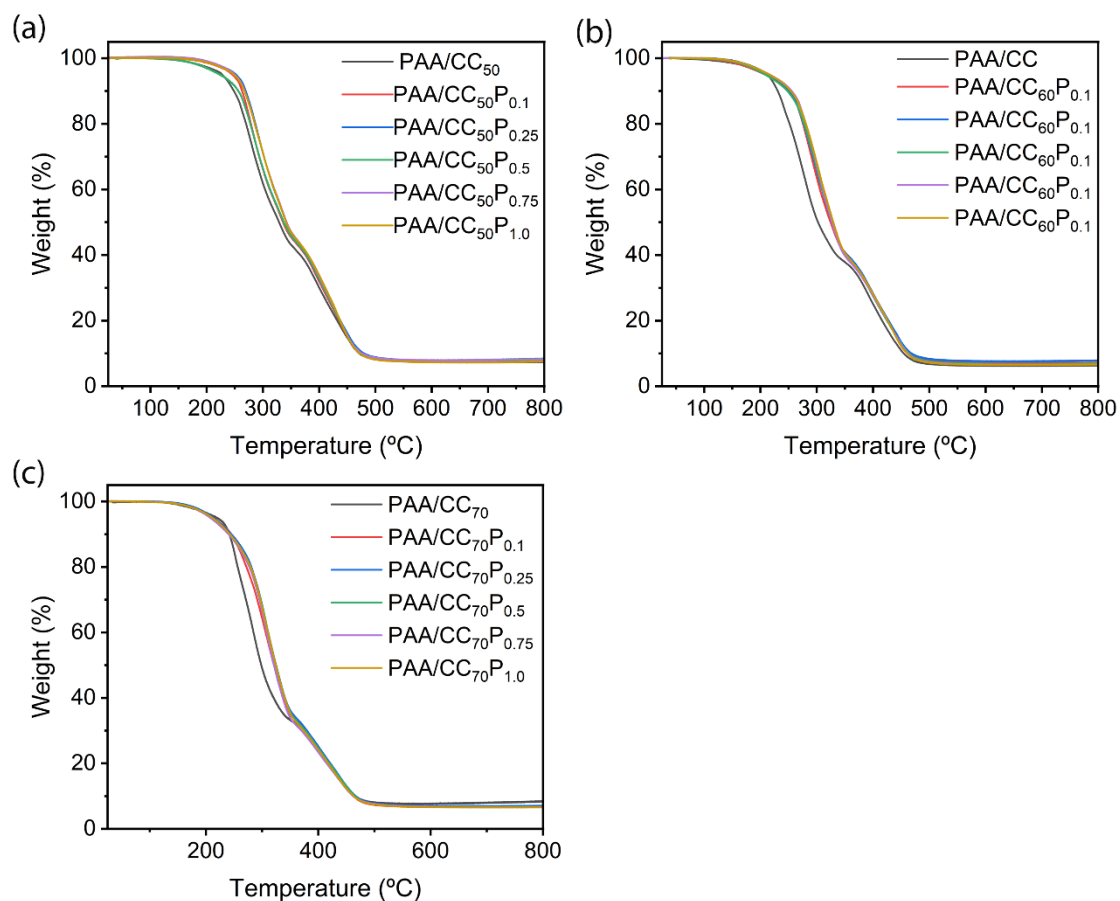

**Figure S20.** TGA spectra of: (a) PAA/CC<sub>50</sub>P<sub>y</sub> (y=0, 0.1, 0.25, 0.5, 0.75 and 1.0, mean the addition amount of crosslinking agent as 0.1%, 0.25%, 0.5%, 0.75% and 1.0% (mol/mol) of AA); (b) PAA/CC<sub>60</sub>P<sub>y</sub> (y=0, 0.1, 0.25, 0.5, 0.75 and 1.0, mean the addition amount of crosslinking agent as 0.1%, 0.25%, 0.5%, 0.75% and 1.0% (mol/mol) of AA); (c) PAA/CC<sub>70</sub>P<sub>y</sub> (y=0, 0.1, 0.25, 0.5, 0.75

and 1.0, mean the addition amount of crosslinking agent as 0.1%, 0.25%, 0.5%, 0.75% and 1.0% (mol/mol) of AA).

**Table S6.**  $T_g$  of PAA hydrogel, PAA/CC eutectogel and CC DES.

| Sample | $T_g$ (°C) |
|--------|------------|
| PAA    | 48.59      |
| CC     | –          |
| PAA/CC | –35.69     |

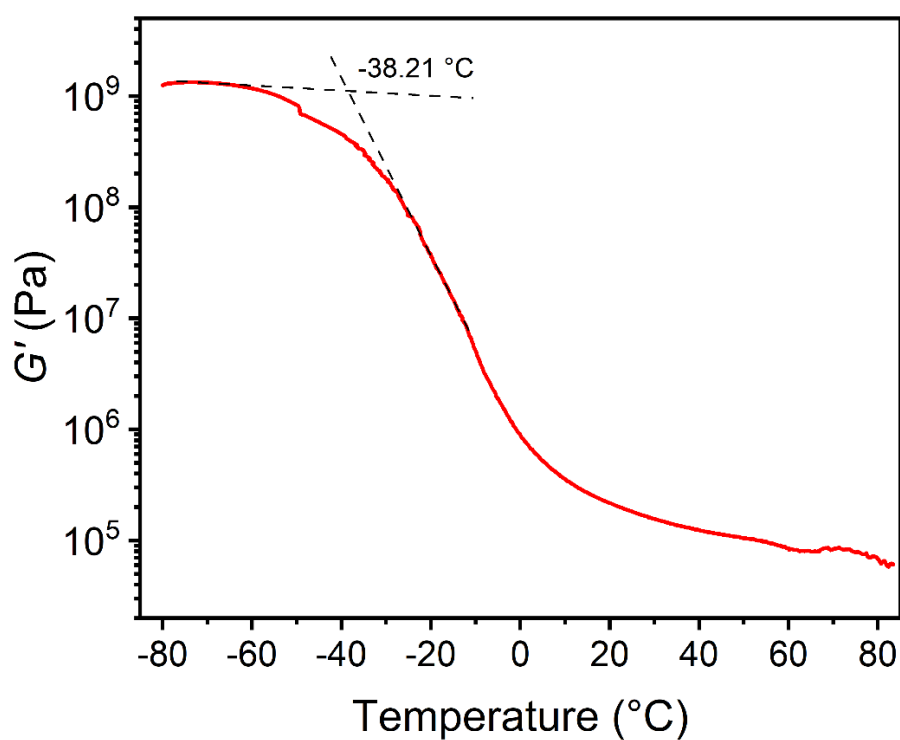

**Figure S21.** Temperature dependence of the storage modulus ( $G'$ ) of PAA/CC.

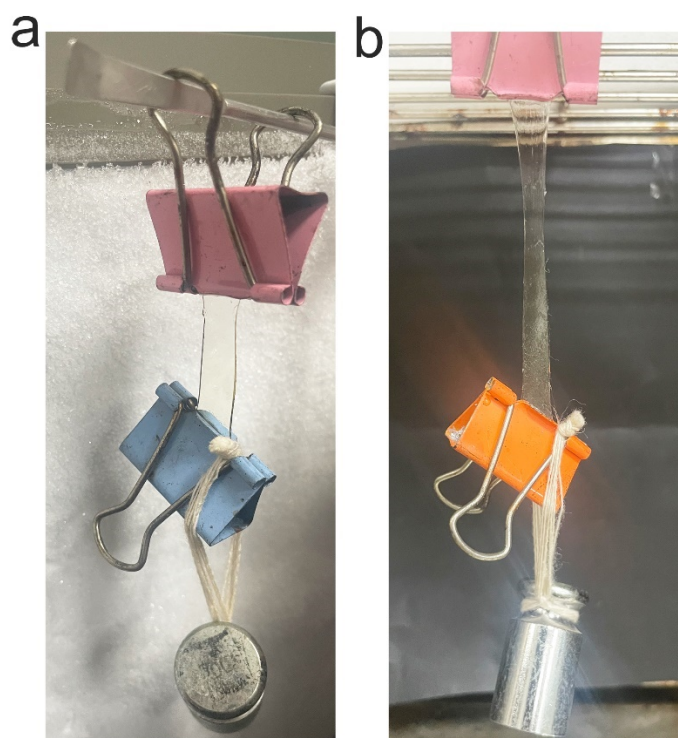

**Figure S22.** The photograph of temperature-tolerance of PAA/CC eutectogel. (a) Storing at -20 °C for 24 h. (b) Storing at 80 °C for 24 h.

### 5.3 The antibacterial performance of PAA/CC eutectogel

**Antibacterial performance evaluation:** The operation procedures are as follows:

**Bacterial inhibition experiment:** The antibacterial performance of eutectogel was evaluated against *Escherichia coli* (*E. coli*, Gram-negative bacteria) and *Staphylococcus aureus* (*S. aureus*, Gram-positive bacteria) using two methods.

(a) Spread plate method: Bacteria seeds were cultured in Luria–Bertani (LB) broth liquid medium at 37 °C with 180 rpm for 24 h. Then, the cultivated seeds were diluted with sterile water to 40 times. 10  $\mu$ L of diluted bacterial liquid was evenly applied onto PAA/CC gels and solid LB broth (control group). The incubation was carried out at 37 °C for 24 hours.

(b) Inhibition zone test (includes four steps):

(1) Specimens: PAA/CC eutectogels were dissolved in sterile water to prepare different concentrations of eutectogel solutions, named  $E_x$  ( $x= 350$  and  $400$ ; denote the concentrations of eutectogels as 350 and 400 mg/mL). PAA hydrogel also was

dissolved in sterile water, the concentration was 400 mg/mL. 500 ppm of CS as a positive control. Soak the sterilized filter papers (diameter is 6 mm) into the above three solutions to prepare the specimens. Sterilized medical PU films (diameter is 6 mm) as a negative control.

(2) Culture of bacterial: 6 mL of bacterial suspensions of *E. coil* and *S. aureus* (solvents were sterile water) were obtained by scraping the different strains after 24 hours of resuscitation by LB broth. Two suspensions were cultured for 18 h in an intelligent shaker.

(3) Preparation of bacterial culture medium: Dilute the above bacterial suspension by 20 times, and pour them into LB broth, then cast them into an empty culture medium plate.

(4) Antibacterial experiments: Put the above specimens in bacterial culture medium, then they all were cultured under the set environment, i.e. 37 °C, normal humidity, and normal atmospheric pressure. After 24 hours, we observed and recorded the survival of the bacteria by antibacterial zone size.

Notably, all procedures were performed in a sterile environment.

The antibacterial ability was calculated using Eq. 5.<sup>25</sup>

$$D_{zh} = \frac{R_z}{R_h} \quad (5)$$

where  $R_z$  is the radius of the bacteriostatic zone;  $R_h$  is the radius of the materials.

Fungal inhibition experiment:

Potato dextrose agar (PDA) media were used to culture two kinds of fungus, *Rhizoctonia solani* Kuhn (*R. solani*) and *Fusarium oxysporum* f. sp. *nelumbicola* (*F. oxysporum*). The inhibition efficiencies of E<sub>400</sub> and sterilized medical PU films were detected. All PDA media were put in the set environment (25 °C, normal humidity, and normal atmospheric pressure). After 7 days, we observed and recorded the survival of the fungus by antibacterial zone size.



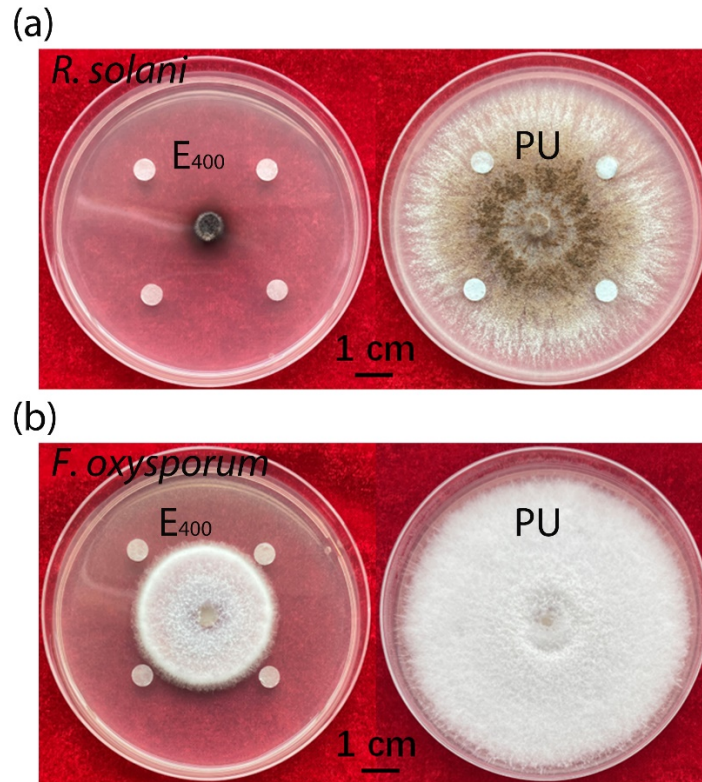

**Figure S23.** Antibacterial capability of PAA/CC to two types of fungus. (a) *R. solani*. (b) *F. oxysporum*.

## 6. Wearable strain sensor applications of PAA/CC eutectogel

A PAA/CC eutectogel sheet (30 mm × 10 mm × 1 mm) with copper plates connected at both ends was attached to the skin of a volunteer's joints. Connect the copper sheet to the test metal clamp. The real-time resistance response of the eutectogel under different strains was recorded by a sourcemeter Keithley 2450 at 2 V. Gauge factor (GF) is a significant index to access the sensitivity of eutectogel, which can be obtained by Eq. 6.

$$GF = \frac{(R - R_0)/R_0}{\varepsilon} \quad (6)$$

where  $R_0$  is the initial resistance of the eutectogel at rest,  $R$  is the real-time resistance during the stretching process and  $\varepsilon$  is imposed strain.

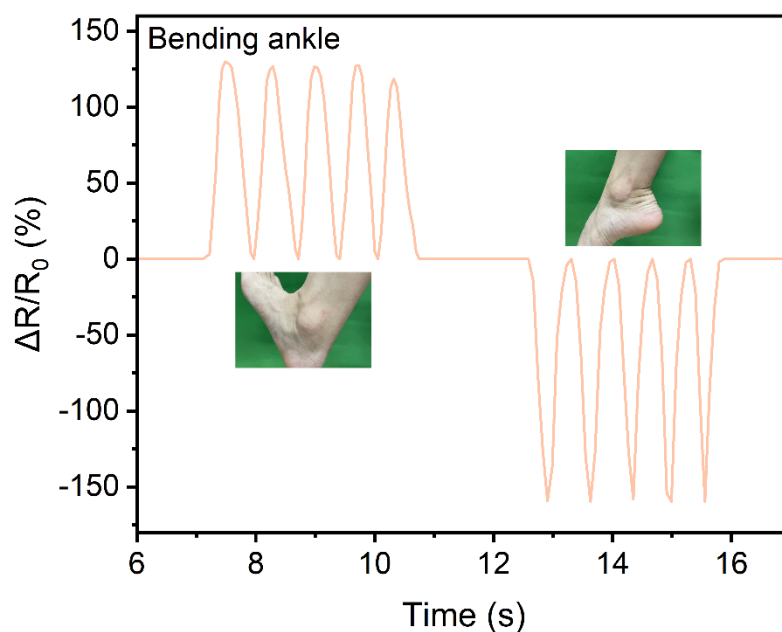

**Figure S24.** Continuous monitoring of ankle movements using the strain sensor across various movement directions and bending angles.

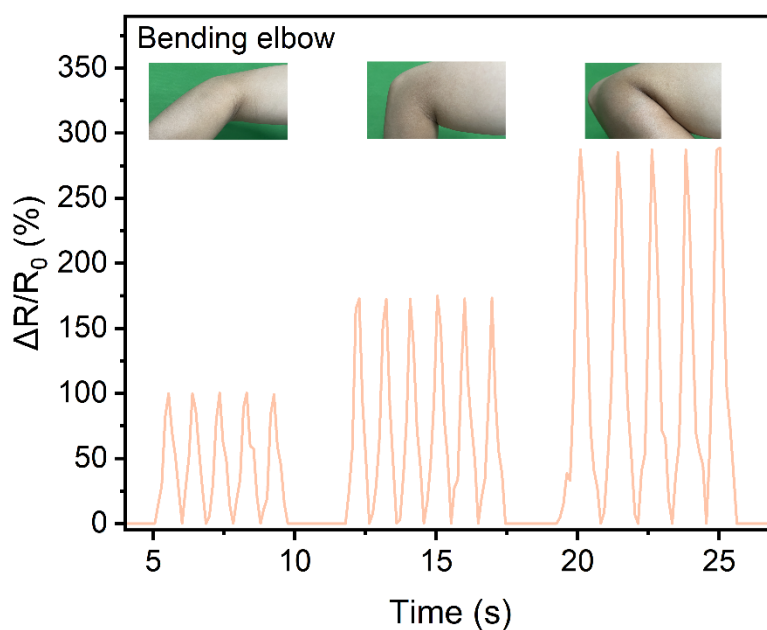

**Figure S25.** Continuous monitoring of elbow motions using the strain sensor at various bending angles.

## 7. Video

**Video S1.** PAA/CC adhering to finger skin and stretching deformation.

**Video S2.** Video of the self-healing for PAA/CC.

**Video S3.** After being stored at  $-20\text{ }^{\circ}\text{C}$  for 24 hours, PAA/CC was subjected to a 500g

weight.

**Video S4.** After being stored at 80 °C for 24 hours, PAA/CC was subjected to a 500g weight.

## 8. References

- 1 Y. Liang, K. Wang, J. Li, H. Wang, X. Q. Xie, Y. Cui, Y. Zhang, M. Wang and C. Liu, *Adv. Funct.Mater.*, 2021, **31**, 2104963.
- 2 K. Fan, W. Wei, Z. Zhang, B. Liu, W. Feng, Y. Ma and X. Zhang, *Chem. Eng. J.*, 2022, **449**, 137878.
- 3 T. Chen, R. Luo, Y. Liu, L. Ma, Z. Li, C. Tao, S. Yang and J. Wang, *ACS Appl. Mater. Interfaces*, 2022, **14**, 40276–40285.
- 4 C. Chai, L. Ma, Y. Chu, W. Li, Y. Qian and J. Hao, *J. Colloid . Interf. Sci.*, 2023, **638**, 439–448.
- 5 H. Sun, B. Zhang, L. Lu, Z. Chen, Y. Huo, W. Li, B. Zhang and J. Song, *Chem. Eng. J.*, 2023, **451**, 139051.
- 6 Y. Wang, S. Fu, L. A. Lucia and H. Zhang, *Compos. Sci. Technol.*, 2022, **229**, 109696.
- 7 K. Xue, C. Shao, J. Yu, H. Zhang, B. Wang, W. Ren, Y. Cheng, Z. Jin, F. Zhang, Z. Wang and R. Sun, *Adv. Funct.Mater.*, 2023, **33**, 2305879.
- 8 Y. Wang, J. Wang, Z. Ma and L. Yan, *ACS Appl. Mater. Interfaces*, 2021, **13**, 54409–54416.
- 9 H. Zhang, N. Tang, X. Yu, M. Li and J. Hu, *Adv. Funct.Mater.*, 2022, **32**, 2206305.
- 10 S. Chen and J. Feng, *ACS Appl. Mater. Interfaces*, 2023, **15**, 44752–44762.
- 11 S. Wang, H. Cheng, B. Yao, H. He, L. Zhang, S. Yue, Z. Wang and J. Ouyang, *ACS Appl. Mater. Interfaces*, 2021, **13**, 20735–20745.
- 12 Y. Liang, D. Zou, Y. Zhang and Z. Zhong, *Chem. Eng. J.*, 2023, **475**, 145928.
- 13 X. Su, S. Zhai, K. Jin, C. Li, A. Chen, Z. Cai, C. Xian and Y. Zhao, *ACS Appl. Mater. Interfaces*, 2023, **15**, 45526–45535.
- 14 M. Li, Z. Liu, Y. Hu, R. a. Li and Y. Cao, *Chem. Eng. J.*, 2023, **472**, 145177.

- 15 J. Yang, Y. Feng, B. Wang, J. Miao, S. Wei, H. Li, L. Mo and Z. Qin, *Chem. Eng. J.*, **474**, 145544.
- 16 R. Zhou, Y. Jin, W. Zeng, H. Jin, L. Shi, L. Bai and X. Shang, *Adv. Funct. Mater.*, 2023, **33**, 2301921.
- 17 T. Lu and F. Chen, *J. Comput. Chem.*, 2012, **33**, 580–592.
- 18 R. M. Parrish, L. A. Burns, D. G. A. Smith, A. C. Simmonett, A. E. DePrince, 3rd, E. G. Hohenstein, U. Bozkaya, A. Y. Sokolov, R. Di Remigio, R. M. Richard, J. F. Gonthier, A. M. James, H. R. McAlexander, A. Kumar, M. Saitow, X. Wang, B. P. Pritchard, P. Verma, H. F. Schaefer, 3rd, K. Patkowski, R. A. King, E. F. Valeev, F. A. Evangelista, J. M. Turney, T. D. Crawford and C. D. Sherrill, *J. Chem. Theory Comput.*, 2017, **13**, 3185–3197.
- 19 T. M. Parker, L. A. Burns, R. M. Parrish, A. G. Ryno and C. D. Sherrill, *J. Chem. Phys.*, 2014, **140**, 094106.
- 20 Z. Long, L. You, X. Tang, W. Ma, Y. Ding and F. Xu, *Const. Build. Mater.*, 2020, **255**, 119354.
- 21 C. Cai, H. Gong, S. Wu, F. Li, S. Liu, Z. Tan and S. Dong, *Chem. Eng. J.*, 2023, **451**, 138674.
- 22 C. Cai, S. Wu, Z. Tan, F. Li and S. Dong, *ACS Appl. Mater. Interfaces*, 2021, **13**, 53083–53090.
- 23 Q. Lu, H. Li and Z. Tan, *ACS Appl. Mater. Interfaces*, 2023, **15**, 34055–34063.
- 24 K. Wang, H. Wang, J. Li, Y. Liang, X. Q. Xie, J. Liu, C. Gu, Y. Zhang, G. Zhang and C. S. Liu, *Mater. Horiz.*, 2021, **8**, 2520–2532.
- 25 S. Duan, Q. Shi, J. Hong, D. Zhu, Y. Lin, Y. Li, W. Lei, C. Lee and J. Wu, *ACS Nano*, 2023, **17**, 1355–1371.
